# Supplementary material
Source: Springer Nature journal article supplement (https://www.springermedizin.de/resource/supplementary/12891_2013_2431_MOESM1_ESM.pdf/9509294)
Supplement: MOESM1 [file 9509294]

## DAS28

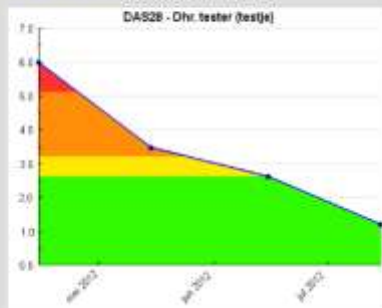

| Datum      | DAS28 score | Aantal pijnlijke gewrichten | Aantal gezwollen gewrichten | Bloedbezinking | Algemeen welbevinden |
|------------|-------------|-----------------------------|-----------------------------|----------------|----------------------|
| 15-07-2012 | 1.20        | 0                           | 0                           | 5.0            | 5                    |
| 15-06-2012 | 2.61        | 2                           | 0                           | 9.0            | 20                   |
| 15-05-2012 | 3.47        | 3                           | 1                           | 13.0           | 30                   |
| 15-04-2012 | 5.98        | 5                           | 4                           | 60.0           | 93                   |

### Wat is de DAS28?

De Disease Activity Score (DAS28) is een ziekteactiviteit score. Deze score geeft inzicht in de activiteit van de ziekte. De score wordt berekend door een combinatie van het aantal pijnlijke en gezwollen gewrichten, de bloedbezinking (of CRP) en het cijfer dat u geeft aan de invloed van de reumatoïde artritis op het dagelijks leven (algemeen welbevinden).

### Wat betekent deze score?

Hoe hoger de ziekteactiviteit score, hoe actiever uw reumatoïde artritis is. De score kan lopen van 0 tot ongeveer 10. We beschouwen de reumatoïde artritis als 'rustig' wanneer de ziekteactiviteit onder de 3,2 zit. Bij een lage ziekteactiviteit ervaren de meeste patiënten ook minder klachten.

### Wat doen we met deze score?

In overleg met uw reumatoloog kan uw medicatie worden aangepast aan de hand van uw DAS28 score. Bij een hoge score kan de medicatie verhoogd, of veranderd worden. Bij een lage score kan uw medicatie ongewijzigd worden voortgezet en soms voorzichtig worden afgebouwd. Reumatoïde artritis is echter wel een wisselende ziekte; uw klachten kunnen ook weer terugkomen en afstemming van uw medicatie blijft van groot belang.
